# Supplementary material for: Arenedisulfonate–lanthanide supramolecular architectures with phenanthroline as a co-ligand: syntheses and structures
Source: Royal Society of Chemistry journal article supplement (doi:10.1039/b707622c), 2007-01-01
Supplement: b707622c.pdf [file b707622c.pdf]

## Supporting Information

### Arenedisulfonate-Lanthanide Supramolecular Architectures with Phenanthroline as Co-ligand: Syntheses and Structures

Jiong-Peng Zhao, Bo-Wen Hu, Fu-Chen Liu, Xin Hu, Yong-Fei Zeng, and Xian-He Bu\*

**Table S1.** Bond Lengths (Å) and Angles (°) with Standard Deviations of **1-4**

| complex 1       |           |                 |           |
|-----------------|-----------|-----------------|-----------|
| Eu(1)-O(4)      | 2.330(2)  | Eu(1)-N(4)      | 2.647(3)  |
| Eu(1)-O(1)      | 2.369(2)  | Eu(1)-N(2)      | 2.674(3)  |
| Eu(1)-O(7)      | 2.432(2)  | Eu(1)-N(3)      | 2.677(3)  |
| Eu(1)-O(1W)     | 2.469(3)  | Eu(1)-N(1)      | 2.680(3)  |
| Eu(1)-O(2W)     | 2.512(3)  | O(4)-Eu(1)-N(3) | 74.57(8)  |
| O(4)-Eu(1)-O(1) | 82.89(9)  | O(1)-Eu(1)-N(3) | 70.78(8)  |
| O(4)-Eu(1)-O(7) | 81.63(9)  | O(7)-Eu(1)-N(3) | 67.35(8)  |
| O(1)-Eu(1)-O(7) | 137.84(8) | N(4)-Eu(1)-N(3) | 61.78(9)  |
| O(4)-Eu(1)-N(4) | 136.25(8) | N(2)-Eu(1)-N(3) | 135.62(9) |
| O(1)-Eu(1)-N(4) | 80.41(9)  | O(4)-Eu(1)-N(1) | 72.79(9)  |
| O(7)-Eu(1)-N(4) | 84.26(9)  | O(1)-Eu(1)-N(1) | 75.98(9)  |
| O(4)-Eu(1)-N(2) | 75.77(9)  | O(7)-Eu(1)-N(1) | 134.45(9) |
| O(1)-Eu(1)-N(2) | 136.20(9) | N(4)-Eu(1)-N(1) | 139.34(9) |
| O(7)-Eu(1)-N(2) | 76.30(9)  | N(2)-Eu(1)-N(1) | 61.38(9)  |
| N(4)-Eu(1)-N(2) | 139.53(9) | N(3)-Eu(1)-N(1) | 135.56(9) |
| complex 2       |           |                 |           |
| Gd(1)-O(4)      | 2.315(2)  | Gd(1)-N(4)      | 2.632(3)  |
| Gd(1)-O(1)      | 2.347(2)  | Gd(1)-N(2)      | 2.657(3)  |
| Gd(1)-O(7)      | 2.409(2)  | Gd(1)-N(1)      | 2.667(3)  |
| Gd(1)-O(1W)     | 2.454(3)  | Gd(1)-N(3)      | 2.668(3)  |

---

|                  |            |                 |            |
|------------------|------------|-----------------|------------|
| Gd(1)-O(2W)      | 2.496(3)   | O(4)-Gd(1)-N(1) | 72.91(8)   |
| O(4)-Gd(1)-O(1)  | 83.08(9)   | O(1)-Gd(1)-N(1) | 75.93(9)   |
| O(4)-Gd(1)-O(7)  | 81.47(8)   | O(7)-Gd(1)-N(1) | 134.76(9)  |
| O(1)-Gd(1)-O(7)  | 137.58(8)  | N(4)-Gd(1)-N(1) | 139.10(9)  |
| O(4)-Gd(1)-N(4)  | 136.53(8)  | N(2)-Gd(1)-N(1) | 61.68(9)   |
| O(1)-Gd(1)-N(4)  | 80.46(9)   | O(4)-Gd(1)-N(3) | 74.36(8)   |
| O(7)-Gd(1)-N(4)  | 84.20(9)   | O(1)-Gd(1)-N(3) | 70.62(8)   |
| O(4)-Gd(1)-N(2)  | 75.43(9)   | O(7)-Gd(1)-N(3) | 67.23(8)   |
| O(1)-Gd(1)-N(2)  | 136.36(9)  | N(4)-Gd(1)-N(3) | 62.25(9)   |
| O(7)-Gd(1)-N(2)  | 76.26(9)   | N(2)-Gd(1)-N(3) | 135.22(9)  |
| N(4)-Gd(1)-N(2)  | 139.43(9)  | N(1)-Gd(1)-N(3) | 135.29(9)  |
| <b>Complex 3</b> |            |                 |            |
| Nd(1)-O(4)       | 2.368(3)   | Nd(1)-N(4)      | 2.678(3)   |
| Nd(1)-O(1)       | 2.409(3)   | Nd(1)-N(3)      | 2.701(3)   |
| Nd(1)-O(7)       | 2.467(3)   | Nd(1)-N(2)      | 2.703(4)   |
| Nd(1)-O(1W)      | 2.510(4)   | Nd(1)-N(1)      | 2.703(3)   |
| Nd(1)-O(2W)      | 2.543(4)   | O(4)-Nd(1)-N(2) | 75.91(11)  |
| O(4)-Nd(1)-O(1)  | 82.50(11)  | O(1)-Nd(1)-N(2) | 61.04(11)  |
| O(4)-Nd(1)-O(7)  | 81.82(10)  | O(7)-Nd(1)-N(2) | 135.92(11) |
| O(1)-Nd(1)-O(7)  | 138.12(10) | N(4)-Nd(1)-N(2) | 76.15(10)  |
| O(4)-Nd(1)-N(4)  | 135.92(10) | N(3)-Nd(1)-N(2) | 139.97(11) |
| O(1)-Nd(1)-N(4)  | 80.27(11)  | O(4)-Nd(1)-N(1) | 135.76(11) |
| O(7)-Nd(1)-N(4)  | 84.60(10)  | O(1)-Nd(1)-N(1) | 72.58(10)  |
| O(4)-Nd(1)-N(3)  | 74.84(10)  | O(7)-Nd(1)-N(1) | 76.04(11)  |
| O(1)-Nd(1)-N(3)  | 71.02(10)  | N(4)-Nd(1)-N(1) | 133.98(11) |
| O(7)-Nd(1)-N(3)  | 67.45(10)  | N(3)-Nd(1)-N(1) | 139.51(11) |
| N(4)-Nd(1)-N(3)  | 61.22(10)  | N(2)-Nd(1)-N(1) | 135.97(11) |
| <b>Complex 4</b> |            |                 |            |
| Tb(1)-O(4)       | 2.348(3)   | Tb(1)-N(3)      | 2.675(3)   |

---

---

|                 |            |                 |            |
|-----------------|------------|-----------------|------------|
| Tb(1)-O(1)      | 2.391(3)   | Tb(1)-N(1)      | 2.702(3)   |
| Tb(1)-O(7)      | 2.449(3)   | Tb(1)-N(2)      | 2.705(3)   |
| Tb(1)-O(1W)     | 2.486(4)   | Tb(1)-N(4)      | 2.707(3)   |
| Tb(1)-O(2W)     | 2.532(3)   | O(4)-Tb(1)-N(2) | 72.75(10)  |
| O(4)-Tb(1)-O(1) | 83.20(10)  | O(1)-Tb(1)-N(2) | 75.84(10)  |
| O(4)-Tb(1)-O(7) | 81.28(9)   | O(7)-Tb(1)-N(2) | 134.71(10) |
| O(1)-Tb(1)-O(7) | 137.50(9)  | N(3)-Tb(1)-N(2) | 139.05(10) |
| O(4)-Tb(1)-N(3) | 136.70(10) | N(1)-Tb(1)-N(2) | 61.87(11)  |
| O(1)-Tb(1)-N(3) | 80.41(10)  | O(4)-Tb(1)-N(4) | 74.39(9)   |
| O(7)-Tb(1)-N(3) | 84.37(10)  | O(1)-Tb(1)-N(4) | 70.39(10)  |
| O(4)-Tb(1)-N(1) | 75.29(10)  | O(7)-Tb(1)-N(4) | 67.37(9)   |
| O(1)-Tb(1)-N(1) | 136.48(10) | N(3)-Tb(1)-N(4) | 62.38(10)  |
| O(7)-Tb(1)-N(1) | 76.13(10)  | N(1)-Tb(1)-N(4) | 135.24(10) |
| N(3)-Tb(1)-N(1) | 139.37(10) | N(2)-Tb(1)-N(4) | 134.93(10) |

---

**Table S2.** Bond Lengths (Å) and Angles (°) with Standard Deviations of **5-7**

---

| Complex <b>5</b> (#1 -x+2,-y+1,-z+1) |            |                   |            |
|--------------------------------------|------------|-------------------|------------|
| Eu(1)-O(1)                           | 2.268(3)   | Eu(1)-N(4)        | 2.623(4)   |
| Eu(1)-O(1)#1                         | 2.280(3)   | Eu(1)-N(1)        | 2.647(5)   |
| Eu(1)-O(2)                           | 2.397(4)   | Eu(1)-N(3)        | 2.670(4)   |
| Eu(1)-O(1W)                          | 2.455(4)   | Eu(1)-N(2)        | 2.605(4)   |
|                                      |            |                   |            |
| O(1)-Eu(1)-O(1)#1                    | 69.31(13)  | O(1)#1-Eu(1)-N(1) | 128.97(13) |
| O(1)-Eu(1)-O(2)                      | 138.99(15) | O(2)-Eu(1)-N(1)   | 73.32(15)  |
| O(1)#1-Eu(1)-O(2)                    | 151.55(16) | N(2)-Eu(1)-N(1)   | 62.44(15)  |
| O(1)-Eu(1)-N(2)                      | 83.30(13)  | N(4)-Eu(1)-N(1)   | 149.58(14) |
| O(1)#1-Eu(1)-N(2)                    | 77.78(13)  | O(1)-Eu(1)-N(3)   | 80.34(12)  |
| O(2)-Eu(1)-N(2)                      | 104.31(14) | O(1)#1-Eu(1)-N(3) | 116.77(12) |
| O(1)-Eu(1)-N(4)                      | 110.98(13) | O(2)-Eu(1)-N(3)   | 74.72(14)  |
| O(1)#1-Eu(1)-N(4)                    | 79.00(12)  | N(2)-Eu(1)-N(3)   | 151.86(15) |
| O(2)-Eu(1)-N(4)                      | 85.21(14)  | N(4)-Eu(1)-N(3)   | 61.97(13)  |
| N(2)-Eu(1)-N(4)                      | 146.04(14) | N(1)-Eu(1)-N(3)   | 91.18(14)  |
|                                      |            |                   |            |
| Complex <b>6</b> (#1 -x+2,-y+1,-z+1) |            |                   |            |
| Gd(1)-O(1)                           | 2.261(4)   | Gd(1)-N(4)        | 2.612(4)   |
| Gd(1)-O(1)#1                         | 2.268(3)   | Gd(1)-N(2)        | 2.637(5)   |
| Gd(1)-O(2)                           | 2.390(4)   | Gd(1)-N(3)        | 2.649(4)   |

---

|                   |            |                   |            |
|-------------------|------------|-------------------|------------|
| Gd(1)-O(1W)       | 2.435(4)   | Gd(1)-Gd(1)#1     | 3.7251(6)  |
| Gd(1)-N(1)        | 2.587(4)   |                   |            |
| O(1)-Gd(1)-O(1)#1 | 69.35(16)  | O(1)#1-Gd(1)-N(2) | 129.84(14) |
| O(1)-Gd(1)-O(2)   | 139.18(15) | O(2)-Gd(1)-N(2)   | 73.03(15)  |
| O(1)#1-Gd(1)-O(2) | 151.28(16) | N(1)-Gd(1)-N(2)   | 62.59(15)  |
| O(1)-Gd(1)-N(1)   | 82.75(14)  | N(4)-Gd(1)-N(2)   | 148.63(14) |
| O(1)#1-Gd(1)-N(1) | 78.21(13)  | O(1)-Gd(1)-N(3)   | 80.28(13)  |
| O(2)-Gd(1)-N(1)   | 104.60(14) | O(1)#1-Gd(1)-N(3) | 116.75(13) |
| O(1)-Gd(1)-N(4)   | 111.44(13) | O(2)-Gd(1)-N(3)   | 74.62(14)  |
| O(1)#1-Gd(1)-N(4) | 79.15(13)  | N(1)-Gd(1)-N(3)   | 150.98(15) |
| O(2)-Gd(1)-N(4)   | 84.51(14)  | N(4)-Gd(1)-N(3)   | 62.23(13)  |
| N(1)-Gd(1)-N(4)   | 146.66(14) | N(2)-Gd(1)-N(3)   | 90.33(14)  |

Complex 7 (#1 -x+2,-y+1,-z+1)

|                   |            |                 |            |
|-------------------|------------|-----------------|------------|
| Tb(1)-O(1)#1      | 2.247(4)   | Tb(1)-N(2)      | 2.579(4)   |
| Tb(1)-O(1)        | 2.255(3)   | Tb(1)-N(3)      | 2.602(4)   |
| Tb(1)-O(2)        | 2.372(4)   | Tb(1)-N(1)      | 2.633(5)   |
| Tb(1)-O(1W)       | 2.422(4)   | Tb(1)-N(4)      | 2.644(4)   |
| O(1)#1-Tb(1)-O(1) | 69.14(15)  |                 |            |
| O(1)#1-Tb(1)-O(2) | 139.18(16) | O(1)-Tb(1)-N(1) | 130.02(14) |
| O(1)-Tb(1)-O(2)   | 151.47(17) | O(2)-Tb(1)-N(1) | 72.92(16)  |
| O(1)#1-Tb(1)-N(2) | 82.97(14)  | N(2)-Tb(1)-N(1) | 63.18(16)  |
| O(1)-Tb(1)-N(2)   | 78.15(14)  | N(3)-Tb(1)-N(1) | 148.33(15) |

---

|                   |            |                   |            |
|-------------------|------------|-------------------|------------|
| O(2)-Tb(1)-N(2)   | 104.68(15) | O(1)#1-Tb(1)-N(4) | 80.29(13)  |
| O(1)#1-Tb(1)-N(3) | 111.84(14) | O(1)-Tb(1)-N(4)   | 116.76(13) |
| O(1)-Tb(1)-N(3)   | 79.30(14)  | O(2)-Tb(1)-N(4)   | 74.42(15)  |
| O(2)-Tb(1)-N(3)   | 84.14(15)  | N(2)-Tb(1)-N(4)   | 151.13(16) |
| N(2)-Tb(1)-N(3)   | 146.15(16) | N(3)-Tb(1)-N(4)   | 62.63(14)  |
| O(1)#1-Tb(1)-N(1) | 75.53(14)  | N(1)-Tb(1)-N(4)   | 89.83(15)  |

---
